# Supplementary material
Source: PubMed Central journal article supplement (PMC2633863)
Supplement: pp.108.130518_1.pdf [file pp.108.130518_1.pdf]

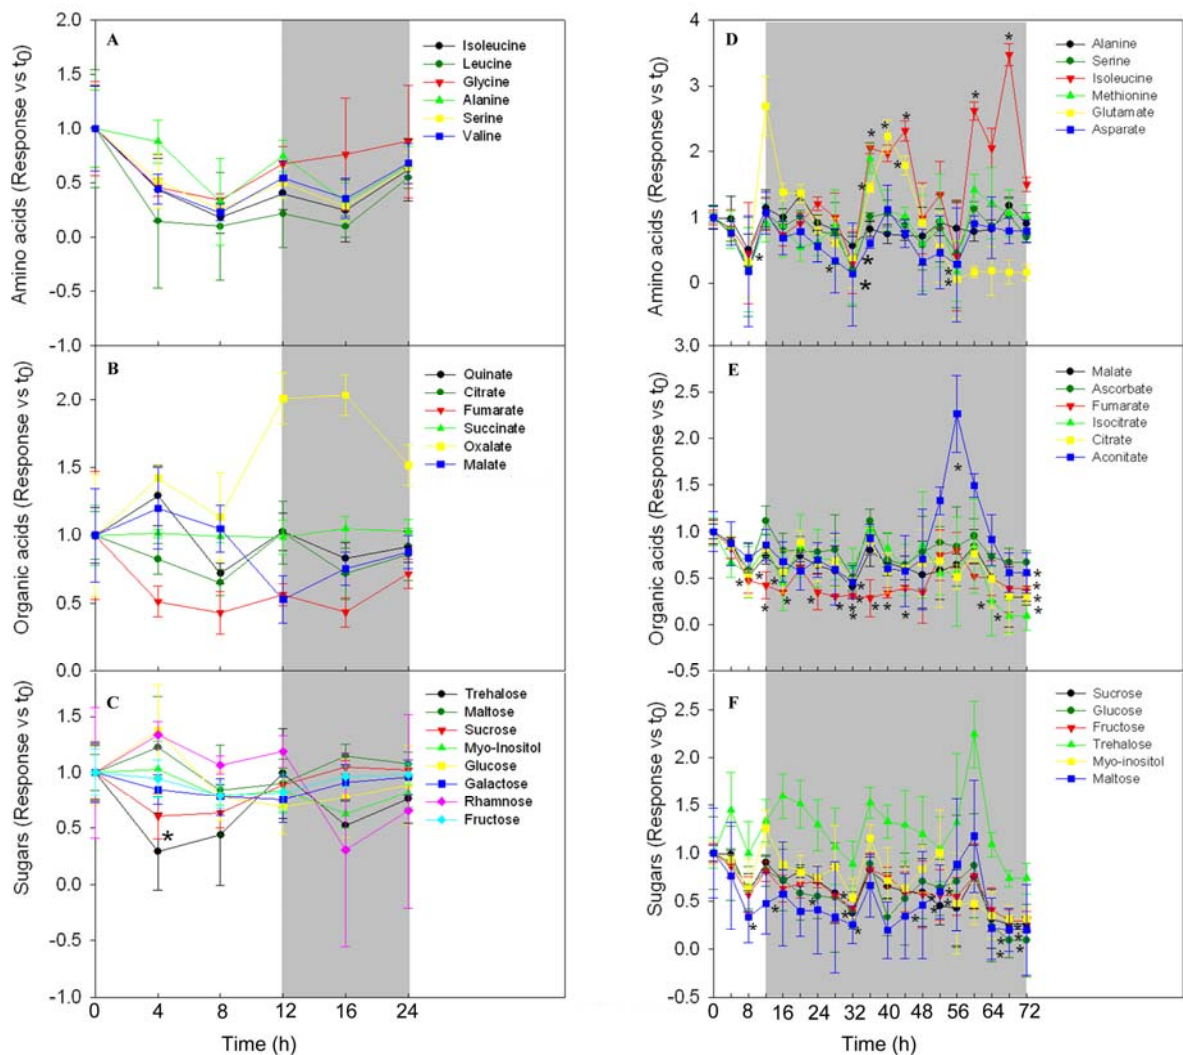

**Supplemental Figure 1.** Relative response ratios of diurnal-like and extended dark period of root metabolites from wild-type tomato plants (*Solanum lycopersicum* cv. Moneymaker). The plants were five-weeks old and samples were taken from mature root tips. Selected amino acids (A, D), organic acids (B, E) and sugar and polyols (C, F) are depicted in the graphs. The shaded areas are representative of the dark period, with the values representative of the mean  $\pm$  SE of four individual plants per time treatment; an asterisk (\*) indicates values determined by the *t*-test to be significantly different from those normalised to the t0 timepoint ( $P < 0.05$ ).

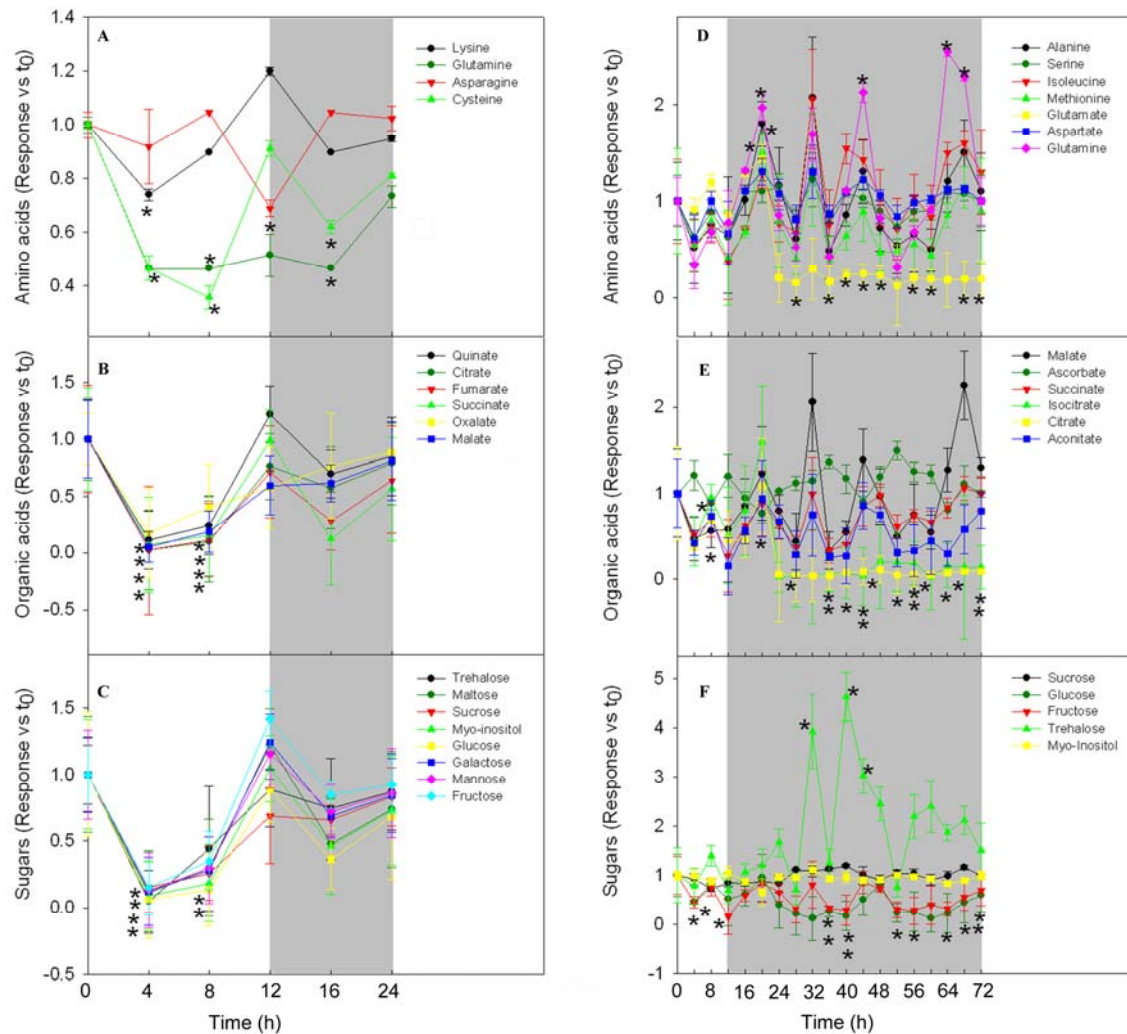

**Supplemental Figure 2.** Relative response ratios of diurnal-like and extended dark period of exudates collected from wild-type tomato plants (*Solanum lycopersicum* cv. Moneymaker). The plants were five-weeks old and samples were taken from mature root tips. Selected amino acids (A, D), organic acids (B, E) and sugar and polyols (C, F) are depicted in the graphs. The shaded areas are representative of the dark period, with the values representative of the mean  $\pm$  SE of four individual plants per time treatment; an asterisk (\*) indicates values determined by the *t*-test to be significantly different from those normalised to the t<sub>0</sub> timepoint (P<0.05).

**Supplemental Table SI.** Relative root exudates of FL and mMDH antisense lines collected at the end of the light period. Metabolites were determined as outlined in „Material and Methods“. The data set were normalised with respect to the wild type, and expressed per whole plant root FW. Values are presented as mean  $\pm$  SE of six individual plants per line; values set in bold type were determined by the *t*-test to be significantly different ( $P < 0.05$ ) from the wild type (WT).

| Metabolite       | WT              | mMDH7           | mMDH8                             | mMDH21          | FL11                              | FL41                               | FL63                              |
|------------------|-----------------|-----------------|-----------------------------------|-----------------|-----------------------------------|------------------------------------|-----------------------------------|
| Aconitate        | 1.00 $\pm$ 0.62 | 1.68 $\pm$ 0.48 | 0.80 $\pm$ 0.37                   | 0.71 $\pm$ 0.42 | 3.18 $\pm$ 0.21                   | 3.01 $\pm$ 0.59                    | 0.88 $\pm$ 0.26                   |
| Alanine          | 1.00 $\pm$ 0.22 | 0.95 $\pm$ 0.07 | 0.87 $\pm$ 0.40                   | 1.42 $\pm$ 0.34 | 2.01 $\pm$ 0.39                   | 2.06 $\pm$ 0.29                    | 1.37 $\pm$ 0.05                   |
| Arabinose        | 1.00 $\pm$ 0.36 | 0.95 $\pm$ 0.14 | 1.07 $\pm$ 0.41                   | 1.63 $\pm$ 0.31 | <b>3.19 <math>\pm</math> 0.14</b> | 1.90 $\pm$ 0.24                    | 1.86 $\pm$ 0.27                   |
| Arginine         | 1.00 $\pm$ 0.47 | 0.74 $\pm$ 0.35 | 0.57 $\pm$ 0.57                   | 1.41 $\pm$ 0.62 | 1.87 $\pm$ 0.45                   | 0.78 $\pm$ 0.39                    | 2.01 $\pm$ 0.60                   |
| Asparagine       | 1.00 $\pm$ 0.29 | 0.94 $\pm$ 0.14 | 1.84 $\pm$ 0.50                   | 1.53 $\pm$ 0.34 | <b>2.47 <math>\pm</math> 0.08</b> | 3.63 $\pm$ 0.39                    | 1.81 $\pm$ 0.23                   |
| Aspartate        | 1.00 $\pm$ 0.21 | 1.65 $\pm$ 0.11 | 0.41 $\pm$ 0.43                   | 2.10 $\pm$ 0.35 | <b>3.86 <math>\pm</math> 0.18</b> | 2.36 $\pm$ 0.19                    | <b>2.66 <math>\pm</math> 0.18</b> |
| $\beta$ -Alanine | 1.00 $\pm$ 0.19 | 1.36 $\pm$ 0.15 | 2.05 $\pm$ 0.58                   | 2.24 $\pm$ 0.34 | <b>3.81 <math>\pm</math> 0.06</b> | 2.53 $\pm$ 0.22                    | <b>3.57 <math>\pm</math> 0.23</b> |
| Benzoate         | 1.00 $\pm$ 0.15 | 0.76 $\pm$ 0.11 | 0.76 $\pm$ 0.25                   | 0.85 $\pm$ 0.14 | <b>2.38 <math>\pm</math> 0.08</b> | 1.64 $\pm$ 0.19                    | 1.28 $\pm$ 0.16                   |
| Citrate          | 1.00 $\pm$ 0.18 | 0.94 $\pm$ 0.35 | 0.60 $\pm$ 0.30                   | 1.63 $\pm$ 0.29 | <b>4.12 <math>\pm</math> 0.09</b> | 2.37 $\pm$ 0.43                    | 1.80 $\pm$ 0.12                   |
| Cysteine         | 1.00 $\pm$ 0.26 | 0.62 $\pm$ 0.13 | 0.65 $\pm$ 0.23                   | 0.94 $\pm$ 0.25 | 2.35 $\pm$ 0.19                   | 1.37 $\pm$ 0.34                    | 2.02 $\pm$ 0.19                   |
| Dehydroascorbate | 1.00 $\pm$ 0.60 | 0.22 $\pm$ 0.48 | 0.14 $\pm$ 0.37                   | 0.16 $\pm$ 0.35 | 0.79 $\pm$ 0.33                   | 0.51 $\pm$ 0.44                    | 0.29 $\pm$ 0.29                   |
| Fructose         | 1.00 $\pm$ 0.26 | 0.96 $\pm$ 0.28 | 0.69 $\pm$ 0.29                   | 0.96 $\pm$ 0.33 | 1.35 $\pm$ 0.19                   | 1.42 $\pm$ 0.27                    | 1.13 $\pm$ 0.22                   |
| Fructose 6-P     | 1.00 $\pm$ 0.29 | 0.45 $\pm$ 0.29 | 0.83 $\pm$ 0.31                   | 1.78 $\pm$ 0.65 | 2.64 $\pm$ 0.30                   | 1.91 $\pm$ 0.54                    | 2.91 $\pm$ 0.50                   |
| Fumarate         | 1.00 $\pm$ 0.10 | 1.09 $\pm$ 0.12 | 1.27 $\pm$ 0.37                   | 1.27 $\pm$ 0.16 | <b>3.52 <math>\pm</math> 0.17</b> | 1.83 $\pm$ 0.31                    | <b>1.58 <math>\pm</math> 0.09</b> |
| GABA             | 1.00 $\pm$ 0.12 | 0.62 $\pm$ 0.36 | 0.85 $\pm$ 0.39                   | 0.83 $\pm$ 0.26 | 2.90 $\pm$ 0.27                   | 1.39 $\pm$ 0.41                    | 0.99 $\pm$ 0.37                   |
| Galactose        | 1.00 $\pm$ 0.10 | 1.20 $\pm$ 0.17 | <b>0.45 <math>\pm</math> 0.30</b> | 1.18 $\pm$ 0.16 | <b>4.03 <math>\pm</math> 0.10</b> | 1.99 $\pm$ 0.50                    | <b>2.25 <math>\pm</math> 0.14</b> |
| Galacturonate    | 1.00 $\pm$ 0.56 | 0.95 $\pm$ 0.49 | 0.97 $\pm$ 0.40                   | 0.99 $\pm$ 0.64 | 4.87 $\pm$ 0.44                   | 2.76 $\pm$ 0.63                    | 1.50 $\pm$ 0.51                   |
| Glucose          | 1.00 $\pm$ 0.12 | 0.80 $\pm$ 0.28 | <b>0.46 <math>\pm</math> 0.23</b> | 1.12 $\pm$ 0.29 | 2.49 $\pm$ 0.32                   | 2.94 $\pm$ 0.39                    | <b>1.60 <math>\pm</math> 0.07</b> |
| Gluconate        | 1.00 $\pm$ 0.26 | 1.54 $\pm$ 0.15 | 0.19 $\pm$ 0.48                   | 1.31 $\pm$ 0.22 | 2.24 $\pm$ 0.28                   | 2.00 $\pm$ 0.47                    | 1.42 $\pm$ 0.33                   |
| Glucose 6-P      | 1.00 $\pm$ 0.19 | 0.52 $\pm$ 0.30 | 0.91 $\pm$ 0.31                   | 1.78 $\pm$ 0.61 | 2.73 $\pm$ 0.25                   | 2.02 $\pm$ 0.55                    | 2.42 $\pm$ 0.46                   |
| Glutamate        | 1.00 $\pm$ 0.23 | 1.16 $\pm$ 0.23 | 1.36 $\pm$ 0.37                   | 1.33 $\pm$ 0.19 | <b>3.68 <math>\pm</math> 0.07</b> | 1.94 $\pm$ 0.34                    | 1.69 $\pm$ 0.06                   |
| Glutamine        | 1.00 $\pm$ 0.18 | 0.66 $\pm$ 0.11 | 0.51 $\pm$ 0.42                   | 1.54 $\pm$ 0.53 | 1.58 $\pm$ 0.21                   | <b>10.29 <math>\pm</math> 0.31</b> | 1.07 $\pm$ 0.20                   |
| Glutarate        | 1.00 $\pm$ 0.20 | 1.12 $\pm$ 0.22 | 0.94 $\pm$ 0.24                   | 3.07 $\pm$ 0.55 | <b>3.02 <math>\pm</math> 0.16</b> | 3.83 $\pm$ 0.37                    | 1.19 $\pm$ 0.16                   |
| Glycerate        | 1.00 $\pm$ 0.11 | 1.10 $\pm$ 0.04 | 1.23 $\pm$ 0.43                   | 1.47 $\pm$ 0.21 | <b>2.72 <math>\pm</math> 0.09</b> | 2.04 $\pm$ 0.24                    | <b>2.05 <math>\pm</math> 0.15</b> |
| Glycerol         | 1.00 $\pm$ 0.16 | 1.20 $\pm$ 0.19 | 0.97 $\pm$ 0.22                   | 1.15 $\pm$ 0.15 | <b>4.08 <math>\pm</math> 0.09</b> | 2.07 $\pm$ 0.22                    | <b>2.24 <math>\pm</math> 0.03</b> |
| Glycerol 1-P     | 1.00 $\pm$ 0.24 | 0.80 $\pm$ 0.17 | 1.21 $\pm$ 0.33                   | 1.90 $\pm$ 0.46 | 2.19 $\pm$ 0.28                   | 1.55 $\pm$ 0.27                    | <b>3.21 <math>\pm</math> 0.19</b> |
| Glycine          | 1.00 $\pm$ 0.16 | 1.36 $\pm$ 0.18 | 1.61 $\pm$ 0.45                   | 1.89 $\pm$ 0.27 | <b>4.42 <math>\pm</math> 0.09</b> | <b>2.58 <math>\pm</math> 0.17</b>  | <b>2.52 <math>\pm</math> 0.11</b> |
| Isoleucine       | 1.00 $\pm$ 0.20 | 0.78 $\pm$ 0.19 | 1.61 $\pm$ 0.50                   | 1.17 $\pm$ 0.39 | <b>2.54 <math>\pm</math> 0.11</b> | 1.61 $\pm$ 0.23                    | 1.96 $\pm$ 0.27                   |
| Isomaltose       | 1.00 $\pm$ 0.25 | 1.55 $\pm$ 0.20 | 4.76 $\pm$ 0.67                   | 2.94 $\pm$ 0.36 | <b>3.60 <math>\pm</math> 0.21</b> | 3.93 $\pm$ 0.42                    | 1.42 $\pm$ 0.37                   |
| Leucine          | 1.00 $\pm$ 0.32 | 0.64 $\pm$ 0.11 | 1.16 $\pm$ 0.37                   | 1.82 $\pm$ 0.56 | 1.74 $\pm$ 0.11                   | 0.79 $\pm$ 0.23                    | 2.94 $\pm$ 0.53                   |
| Lysine           | 1.00 $\pm$ 0.59 | 1.02 $\pm$ 0.45 | 0.57 $\pm$ 0.53                   | 0.76 $\pm$ 0.54 | 2.55 $\pm$ 0.56                   | 0.67 $\pm$ 0.27                    | 1.75 $\pm$ 0.50                   |
| Malate           | 1.00 $\pm$ 0.15 | 1.01 $\pm$ 0.30 | 1.43 $\pm$ 0.44                   | 1.66 $\pm$ 0.18 | <b>4.57 <math>\pm</math> 0.16</b> | 1.58 $\pm$ 0.52                    | 1.51 $\pm$ 0.27                   |
| Maltitol         | 1.00 $\pm$ 0.31 | 1.71 $\pm$ 0.08 | 0.98 $\pm$ 0.30                   | 1.44 $\pm$ 0.37 | <b>5.03 <math>\pm</math> 0.20</b> | 2.68 $\pm$ 0.45                    | 2.41 $\pm$ 0.44                   |
| Maltose          | 1.00 $\pm$ 0.64 | 1.13 $\pm$ 0.30 | 2.23 $\pm$ 0.43                   | 0.72 $\pm$ 0.34 | 2.96 $\pm$ 0.29                   | 1.56 $\pm$ 0.29                    | 1.61 $\pm$ 0.23                   |
| Mannose          | 1.00 $\pm$ 0.10 | 1.34 $\pm$ 0.15 | <b>0.48 <math>\pm</math> 0.25</b> | 1.19 $\pm$ 0.16 | <b>4.03 <math>\pm</math> 0.10</b> | 2.00 $\pm$ 0.50                    | 1.87 $\pm$ 0.30                   |
| Methionine       | 1.00 $\pm$ 0.15 | 0.78 $\pm$ 0.11 | 1.14 $\pm$ 0.42                   | 1.17 $\pm$ 0.27 | <b>3.09 <math>\pm</math> 0.14</b> | 1.03 $\pm$ 0.27                    | 1.86 $\pm$ 0.41                   |
| Myo-inositol     | 1.00 $\pm$ 0.30 | 0.76 $\pm$ 0.48 | 0.56 $\pm$ 0.45                   | 0.61 $\pm$ 0.51 | 2.01 $\pm$ 0.36                   | 1.83 $\pm$ 0.55                    | 1.64 $\pm$ 0.23                   |
| Myo-inositol 1-P | 1.00 $\pm$ 0.24 | 0.96 $\pm$ 0.31 | 1.12 $\pm$ 0.30                   | 1.79 $\pm$ 0.53 | 3.12 $\pm$ 0.29                   | 2.38 $\pm$ 0.45                    | 2.94 $\pm$ 0.39                   |
| Myo-inositol 2-P | 1.00 $\pm$ 0.26 | 1.18 $\pm$ 0.30 | 1.21 $\pm$ 0.38                   | 1.15 $\pm$ 0.57 | 2.79 $\pm$ 0.36                   | 1.73 $\pm$ 0.47                    | 2.69 $\pm$ 0.44                   |
| Oxalate          | 1.00 $\pm$ 0.26 | 0.68 $\pm$ 0.27 | 1.02 $\pm$ 0.65                   | 1.24 $\pm$ 0.26 | <b>4.81 <math>\pm</math> 0.24</b> | 3.62 $\pm$ 0.24                    | 1.44 $\pm$ 0.07                   |
| Palmeate (16:0)  | 1.00 $\pm$ 0.58 | 0.73 $\pm$ 0.50 | 0.40 $\pm$ 0.40                   | 0.39 $\pm$ 0.39 | 1.80 $\pm$ 0.32                   | 1.94 $\pm$ 0.50                    | 0.82 $\pm$ 0.39                   |
| Phenylalanine    | 1.00 $\pm$ 0.26 | 0.85 $\pm$ 0.13 | 0.92 $\pm$ 0.35                   | 1.31 $\pm$ 0.31 | 2.50 $\pm$ 0.19                   | 1.35 $\pm$ 0.21                    | 1.95 $\pm$ 0.34                   |
| Proline          | 1.00 $\pm$ 0.28 | 1.29 $\pm$ 0.21 | 1.52 $\pm$ 0.43                   | 3.64 $\pm$ 0.37 | 2.92 $\pm$ 0.25                   | 1.93 $\pm$ 0.36                    | 1.85 $\pm$ 0.41                   |
| Putrescine       | 1.00 $\pm$ 0.50 | 0.74 $\pm$ 0.40 | 0.62 $\pm$ 0.27                   | 0.66 $\pm$ 0.47 | 2.69 $\pm$ 0.38                   | 3.13 $\pm$ 0.65                    | 1.49 $\pm$ 0.35                   |
| Quinate          | 1.00 $\pm$ 0.08 | 1.17 $\pm$ 0.12 | 0.72 $\pm$ 0.14                   | 1.49 $\pm$ 0.18 | <b>3.81 <math>\pm</math> 0.10</b> | 1.79 $\pm$ 0.41                    | <b>1.90 <math>\pm</math> 0.13</b> |
| Raffinose        | 1.00 $\pm$ 0.37 | 0.83 $\pm$ 0.33 | 6.05 $\pm$ 0.71                   | 3.97 $\pm$ 0.44 | 2.20 $\pm$ 0.17                   | 2.14 $\pm$ 0.41                    | 1.52 $\pm$ 0.12                   |
| Rhamnose         | 1.00 $\pm$ 0.12 | 1.00 $\pm$ 0.15 | 2.16 $\pm$ 0.54                   | 1.78 $\pm$ 0.20 | <b>3.37 <math>\pm</math> 0.22</b> | 4.82 $\pm$ 0.40                    | 1.62 $\pm$ 0.15                   |
| Ribose           | 1.00 $\pm$ 0.11 | 1.05 $\pm$ 0.13 | 1.35 $\pm$ 0.47                   | 1.48 $\pm$ 0.25 | <b>3.37 <math>\pm</math> 0.09</b> | 1.92 $\pm$ 0.23                    | <b>2.11 <math>\pm</math> 0.12</b> |
| Saccharate       | 1.00 $\pm$ 0.16 | 1.01 $\pm$ 0.16 | 0.57 $\pm$ 0.32                   | 0.93 $\pm$ 0.22 | <b>3.20 <math>\pm</math> 0.20</b> | 1.63 $\pm$ 0.31                    | 1.63 $\pm$ 0.12                   |
| Serine           | 1.00 $\pm$ 0.18 | 1.14 $\pm$ 0.21 | 2.61 $\pm$ 0.66                   | 3.02 $\pm$ 0.39 | 3.08 $\pm$ 0.14                   | 1.92 $\pm$ 0.31                    | 3.29 $\pm$ 0.28                   |

| Metabolite      | WT          | mMDH7              | mMDH8       | mMDH21      | FL11               | FL41               | FL63               |
|-----------------|-------------|--------------------|-------------|-------------|--------------------|--------------------|--------------------|
| Shikimate       | 1.00 ± 0.15 | 1.36 ± 0.12        | 0.46 ± 0.48 | 1.59 ± 0.15 | <b>4.19 ± 0.22</b> | <b>2.02 ± 0.24</b> | <b>2.14 ± 0.17</b> |
| Stearate (18:0) | 1.00 ± 0.41 | 0.76 ± 0.38        | 0.44 ± 0.21 | 0.56 ± 0.32 | 1.76 ± 0.26        | 2.06 ± 0.39        | 1.04 ± 0.31        |
| Succinate       | 1.00 ± 0.22 | 1.23 ± 0.22        | 0.84 ± 0.14 | 1.52 ± 0.32 | <b>3.60 ± 0.22</b> | 1.57 ± 0.44        | 2.11 ± 0.21        |
| Sucrose         | 1.00 ± 0.25 | 0.98 ± 0.33        | 1.44 ± 0.44 | 1.83 ± 0.46 | 3.92 ± 0.67        | 1.19 ± 0.65        | 1.77 ± 0.36        |
| t-4-HO-Proline  | 1.00 ± 0.19 | 1.62 ± 0.21        | 1.85 ± 0.56 | 2.17 ± 0.37 | <b>3.66 ± 0.16</b> | 1.77 ± 0.32        | 2.12 ± 0.05        |
| Tartrate        | 1.00 ± 0.35 | 1.00 ± 0.30        | 0.40 ± 0.21 | 2.00 ± 0.56 | 6.73 ± 0.34        | 2.23 ± 0.42        | 1.12 ± 0.05        |
| Threonate       | 1.00 ± 0.27 | 0.57 ± 0.12        | 0.64 ± 0.25 | 0.95 ± 0.22 | 2.37 ± 0.25        | 1.41 ± 0.32        | 1.99 ± 0.19        |
| Threonine       | 1.00 ± 0.20 | 0.75 ± 0.15        | 2.76 ± 0.68 | 1.9 ± 0.27  | <b>2.42 ± 0.14</b> | 1.60 ± 0.27        | 3.06 ± 0.29        |
| Trehalose       | 1.00 ± 0.30 | <b>0.08 ± 0.44</b> | 0.71 ± 0.46 | 0.73 ± 0.37 | <b>3.19 ± 0.15</b> | 1.00 ± 0.15        | 0.59 ± 0.26        |
| Tryptophan      | 1.00 ± 0.52 | 0.72 ± 0.49        | 0.98 ± 0.40 | 1.00 ± 0.57 | 1.72 ± 0.36        | 0.85 ± 0.60        | 1.45 ± 0.61        |
| Tyramine        | 1.00 ± 0.59 | 0.94 ± 0.48        | 0.55 ± 0.45 | 0.63 ± 0.44 | 2.41 ± 0.51        | 0.62 ± 0.32        | 1.52 ± 0.46        |
| Valine          | 1.00 ± 0.18 | 0.81 ± 0.13        | 1.38 ± 0.49 | 1.18 ± 0.27 | 2.62 ± 0.09        | 1.32 ± 0.21        | 1.75 ± 0.25        |
| Xylose          | 1.00 ± 0.33 | 0.81 ± 0.47        | 0.89 ± 0.21 | 1.46 ± 0.24 | <b>3.07 ± 0.09</b> | 2.42 ± 0.46        | 1.75 ± 0.24        |

**Supplemental Table SII** Absolute endo-metabolites concentrations (mmol.g<sup>-1</sup> FW) of mature root tips determined in 5 week-old transgenic FL and mMDH lines. Values are presented as mean ± SE of six individual plants per line; values set in bold type were determined by the *t*-test to be significantly different (*P*<0.05) from the wild type (WT).

| Metabolite       | WT             | mMDH7              | mMDH8              | mMDH21<br>mmol.g <sup>-1</sup> FW | FL11                | FL41                | FL63               |
|------------------|----------------|--------------------|--------------------|-----------------------------------|---------------------|---------------------|--------------------|
| aconitate        | 20.29 ± 9.66   | 20.00 ± 7.01       | 17.71 ± 7.15       | 17.86 ± 6.89                      | 11.27 ± 5.87        | 4.84 ± 1.68         | 15.39 ± 11.18      |
| Alanine          | 0.01 ± 0.00    | 0.01 ± 0.00        | 0.03 ± 0.01        | 0.02 ± 0.01                       | 0.02 ± 0.01         | 0.04 ± 0.01         | 0.02 ± 0.00        |
| Arabinose        | 1.89 ± 0.62    | <b>5.04 ± 1.67</b> | <b>5.50 ± 1.55</b> | 2.85 ± 1.10                       | 2.31 ± 0.71         | 3.72 ± 1.62         | 1.56 ± 0.39        |
| Arginine         | 7.68 ± 2.79    | 7.05 ± 3.22        | 13.11 ± 6.46       | 7.47 ± 4.51                       | 5.27 ± 2.94         | 11.86 ± 7.11        | 6.56 ± 3.95        |
| ascorbate        | 7.96 ± 2.89    | 15.55 ± 8.17       | 9.73 ± 3.15        | 6.36 ± 2.49                       | 5.09 ± 2.57         | 2.32 ± 0.76         | 2.02 ± 1.11        |
| Asparagine       | 12.30 ± 4.30   | 14.93 ± 4.34       | 17.50 ± 14.94      | 10.78 ± 4.94                      | 10.18 ± 6.92        | 9.43 ± 5.03         | 19.69 ± 15.35      |
| Aspartate        | 0.08 ± 0.04    | 0.07 ± 0.04        | 0.05 ± 0.01        | 0.03 ± 0.02                       | 0.17 ± 0.08         | 0.06 ± 0.02         | 0.04 ± 0.01        |
| Citrate          | 12.19 ± 3.95   | 17.37 ± 5.28       | 21.28 ± 6.53       | 8.44 ± 3.24                       | 5.75 ± 1.52         | <b>2.84 ± 1.38</b>  | <b>3.57 ± 1.71</b> |
| Cysteine         | 0.02 ± 0.00    | 0.04 ± 0.02        | 0.05 ± 0.02        | 0.02 ± 0.01                       | 0.02 ± 0.01         | 0.02 ± 0.00         | 0.01 ± 0.00        |
| Dehydroascorbate | 16.75 ± 5.47   | 20.86 ± 7.23       | 24.09 ± 12.81      | 15.73 ± 5.92                      | 6.69 ± 2.22         | 10.70 ± 8.11        | 3.58 ± 0.87        |
| Fructose         | 12.99 ± 4.68   | 10.08 ± 5.57       | 20.10 ± 8.44       | 9.96 ± 2.58                       | <b>2.17 ± 0.87</b>  | <b>0.98 ± 0.52</b>  | <b>2.23 ± 0.78</b> |
| Fumarate         | 0.20 ± 0.06    | 0.40 ± 0.24        | 0.65 ± 0.36        | 0.17 ± 0.04                       | 0.68 ± 0.32         | 0.22 ± 0.07         | 0.20 ± 0.07        |
| GABA             | 833 ± 175      | 938.89 ± 344       | 1147 ± 458         | 711 ± 272                         | <b>239 ± 52</b>     | <b>350 ± 125</b>    | <b>208 ± 44</b>    |
| Galactose        | 35.46 ± 11.17  | 72.49 ± 32.19      | 44.26 ± 21.99      | 61.89 ± 35.18                     | <b>11.22 ± 3.59</b> | 14.10 ± 7.98        | <b>6.94 ± 3.06</b> |
| Galacturonate    | 57.91 ± 29.57  | 82.04 ± 40.57      | 100.62 ± 56.80     | 64.09 ± 31.39                     | 60.07 ± 42.36       | 15.45 ± 8.91        | 50.10 ± 42.73      |
| Glucose          | 38.95 ± 12.65  | 49.50 ± 18.94      | 35.91 ± 17.26      | 63.95 ± 34.21                     | 18.28 ± 5.06        | <b>10.30 ± 4.27</b> | <b>9.83 ± 3.88</b> |
| Glutamate        | 206.64 ± 84.47 | 179.04 ± 80.87     | 243.79 ± 78.55     | 199.54 ± 97.70                    | 53.62 ± 22.66       | <b>33.20 ± 8.55</b> | 25.99 ± 12.15      |
| Glutamine        | 146.25 ± 48.08 | 828.00 ± 338.59    | 1534.67 ± 933.70   | 1016.67 ± 551.89                  | <b>14.29 ± 2.79</b> | 29.33 ± 12.75       | <b>8.89 ± 1.65</b> |
| Glycerol 3-P     | 0.88 ± 0.27    | 1.35 ± 0.34        | 1.58 ± 0.65        | 1.47 ± 0.82                       | 2.07 ± 0.86         | <b>2.40 ± 0.53</b>  | 0.49 ± 0.18        |
| Glycine          | 0.04 ± 0.01    | 0.06 ± 0.03        | 0.04 ± 0.01        | 0.04 ± 0.01                       | 0.08 ± 0.01         | <b>0.03 ± 0.01</b>  | <b>0.04 ± 0.01</b> |
| Isocitrate       | 0.06 ± 0.02    | 0.12 ± 0.04        | 0.08 ± 0.03        | 0.07 ± 0.03                       | 0.07 ± 0.03         | 0.02 ± 0.01         | 0.06 ± 0.04        |
| Isoleucine       | 0.11 ± 0.03    | 0.15 ± 0.05        | 0.25 ± 0.13        | 0.30 ± 0.15                       | 0.19 ± 0.09         | 0.10 ± 0.03         | 0.13 ± 0.04        |
| Leucine          | 0.13 ± 0.05    | 0.13 ± 0.07        | 0.41 ± 0.18        | 0.16 ± 0.07                       | 0.20 ± 0.09         | 0.17 ± 0.11         | 0.13 ± 0.04        |
| Lysine           | 0.24 ± 0.07    | 0.89 ± 0.55        | 1.03 ± 0.64        | 0.65 ± 0.26                       | 0.36 ± 0.14         | 0.28 ± 0.16         | 0.29 ± 0.14        |
| Malate           | 1.76 ± 0.54    | 1.86 ± 1.14        | 3.18 ± 0.86        | 1.82 ± 0.60                       | <b>0.66 ± 0.23</b>  | <b>0.39 ± 0.13</b>  | <b>1.15 ± 0.37</b> |
| Maltitol         | 2475 ± 1125    | 12570 ± 4446       | 4918 ± 2596        | 12752 ± 4979                      | 2926 ± 1433         | 1776 ± 1138         | 1670 ± 865         |
| Maltose          | 0.17 ± 0.06    | <b>0.42 ± 0.09</b> | 0.33 ± 0.09        | 0.38 ± 0.11                       | 0.29 ± 0.08         | 0.15 ± 0.08         | 0.10 ± 0.03        |
| Mannitol         | 0.81 ± 0.26    | 1.25 ± 0.43        | 1.44 ± 0.45        | 1.03 ± 0.39                       | 1.73 ± 1.10         | 3.73 ± 3.34         | 7.13 ± 4.72        |
| Methionine (x10) | 1.20 ± 0.50    | 0.70 ± 0.20        | <b>0.20 ± 0.10</b> | 0.60 ± 0.20                       | <b>0.20 ± 0.10</b>  | <b>0.10 ± 0.10</b>  | <b>0.10 ± 0.02</b> |

|                 |                |                       |                       |                      |                     |                    |                      |
|-----------------|----------------|-----------------------|-----------------------|----------------------|---------------------|--------------------|----------------------|
| Myo-inositol    | 9.53 ± 3.83    | 6.69 ± 1.98           | 4.32 ± 1.20           | 3.65 ± 1.19          | <b>2.60 ± 0.79</b>  | 2.65 ± 1.27        | <b>1.14 ± 0.24</b>   |
| Palmeate (16:0) | 10.06 ± 3.55   | 21.62 ± 8.32          | 15.87 ± 6.34          | 11.78 ± 4.95         | 8.83 ± 2.87         | 4.88 ± 1.30        | 4.95 ± 1.90          |
| Penylalanine    | 0.06 ± 0.02    | 0.10 ± 0.04           | 0.08 ± 0.04           | 0.05 ± 0.03          | 0.03 ± 0.01         | 0.03 ± 0.01        | 0.02 ± 0.01          |
| Proline         | 9.83 ± 3.69    | 13.81 ± 7.88          | 13.89 ± 5.82          | 15.16 ± 9.89         | 12.79 ± 6.39        | 2.35 ± 0.54        | 10.19 ± 2.98         |
| Putrescine      | 356 ± 107      | 990 ± 298             | 465 ± 193             | 1155 ± 442           | 380 ± 103           | 372 ± 239          | 242 ± 79             |
| Quinate         | 1.30 ± 0.48    | 1.11 ± 0.43           | 1.90 ± 0.57           | 2.06 ± 1.28          | 1.49 ± 0.49         | 0.86 ± 0.31        | 0.56 ± 0.15          |
| Ribose          | 2304 ± 604     | 4099 ± 1365           | 3342 ± 1567           | 2262 ± 1090          | 2115 ± 985          | 343 ± 81           | 1274 ± 241           |
| Serine          | 121.73 ± 69.54 | 367.56 ± 150.06       | 287.11 ± 140.70       | 206.96 ± 98.98       | 147.25 ± 57.66      | 136.99 ± 87.64     | 104.85 ± 21.84       |
| Shikimate       | 0.08 ± 0.02    | <b>0.26 ± 0.08</b>    | 0.08 ± 0.03           | 0.07 ± 0.02          | 0.07 ± 0.03         | <b>0.01 ± 0.00</b> | <b>0.02 ± 0.01</b>   |
| Stearate (18:0) | 3.59 ± 1.20    | <b>23.99 ± 10.09</b>  | <b>26.77 ± 10.93</b>  | <b>18.51 ± 8.31</b>  | <b>23.49 ± 6.23</b> | 7.15 ± 1.37        | 5.56 ± 2.12          |
| Succinate       | 7.53 ± 2.85    | 33.88 ± 11.32         | <b>100.84 ± 30.96</b> | <b>96.90 ± 36.18</b> | 38.84 ± 14.68       | 67.28 ± 39.27      | <b>83.06 ± 19.67</b> |
| Sucrose         | 4.53 ± 1.37    | 9.24 ± 4.08           | 8.07 ± 3.24           | 4.96 ± 1.31          | 4.19 ± 2.84         | <b>1.20 ± 0.43</b> | <b>0.96 ± 0.32</b>   |
| Threonine       | 0.04 ± 0.01    | 0.07 ± 0.03           | 0.04 ± 0.01           | 0.07 ± 0.04          | 0.06 ± 0.02         | 0.04 ± 0.01        | 0.05 ± 0.02          |
| Trehalose       | 3.89 ± 1.27    | 5.22 ± 1.50           | 8.76 ± 3.95           | 5.03 ± 1.79          | 5.45 ± 1.55         | 2.29 ± 1.45        | 2.28 ± 0.99          |
| Tryptophan      | 41.88 ± 13.50  | <b>116.39 ± 31.05</b> | 140.36 ± 73.82        | 62.75 ± 42.50        | 31.07 ± 13.86       | 53.13 ± 31.50      | 79.17 ± 39.70        |
| Tyrosine        | 1.49 ± 0.42    | <b>4.94 ± 1.75</b>    | 7.87 ± 5.35           | 1.40 ± 0.22          | 1.36 ± 0.90         | 1.99 ± 1.33        | 1.80 ± 1.38          |
| Valine          | 19.38 ± 5.15   | 18.60 ± 5.27          | 36.41 ± 16.90         | 19.69 ± 6.18         | 28.42 ± 9.89        | 27.55 ± 15.54      | 17.33 ± 3.76         |
| Xylose          | 0.73 ± 0.28    | <b>6.54 ± 2.72</b>    | 1.53 ± 0.42           | 1.80 ± 0.59          | 1.22 ± 0.68         | 1.05 ± 0.65        | 0.43 ± 0.13          |

---

**Supplemental Table SIII** Absolute exudate concentrations (mmol g<sup>-1</sup> FW) of root exo-metabolites recovered at the end of the light period from transgenic FL and mMDH antisense lines. Values are presented as mean ± SE of six individual plants per line; values set in bold type were determined by the *t*-test to be significantly different (P<0.05) from the wild type (WT).

| Metabolite             | WT                      | mMDH7         | mMDH8              | MDH21         | FL11                | FL41               | FL63               |
|------------------------|-------------------------|---------------|--------------------|---------------|---------------------|--------------------|--------------------|
|                        | mmol.g <sup>-1</sup> FW |               |                    |               |                     |                    |                    |
| Aconitate              | 0.10 ± 0.01             | 0.03 ± 0.01   | 0.01 ± 0.01        | 0.01 ± 0.01   | 0.06 ± 0.01         | 0.06 ± 0.03        | 0.02 ± 0.01        |
| Alanine (x10)          | 0.05 ± 0.01             | 0.05 ± 0.00   | 0.05 ± 0.02        | 0.08 ± 0.03   | 0.11 ± 0.04         | 0.11 ± 0.03        | 0.07 ± 0.00        |
| β-Alanine              | 1.06 ± 0.20             | 1.43 ± 0.21   | 2.17 ± 1.26        | 2.37 ± 0.82   | <b>4.02 ± 0.26</b>  | 2.67 ± 0.60        | <b>3.77 ± 0.88</b> |
| Arabinose              | 0.03 ± 0.01             | 0.03 ± 0.01   | 0.03 ± 0.01        | 0.05 ± 0.02   | <b>0.10 ± 0.01</b>  | 0.06 ± 0.01        | 0.06 ± 0.02        |
| Arginine               | 0.01 ± 0.01             | 0.01 ± 0.01   | 0.01 ± 0.01        | 0.02 ± 0.01   | 0.03 ± 0.01         | 0.01 ± 0.01        | 0.03 ± 0.02        |
| Asparagine             | 7.92 ± 2.33             | 7.42 ± 1.05   | 14.55 ± 7.27       | 12.11 ± 4.11  | <b>19.56 ± 1.51</b> | 28.74 ± 11.14      | 14.32 ± 3.29       |
| Aspartate (x10)        | 0.10 ± 0.02             | 0.13 ± 0.01   | 0.03 ± 0.01        | 0.16 ± 0.06   | <b>0.30 ± 0.05</b>  | 0.18 ± 0.03        | <b>0.20 ± 0.04</b> |
| Benzoate               | 0.20 ± 0.03             | 0.15 ± 0.02   | 0.15 ± 0.04        | 0.17 ± 0.02   | <b>0.49 ± 0.04</b>  | 0.34 ± 0.06        | 0.26 ± 0.04        |
| Citrate                | 0.02 ± 0.01             | 0.02 ± 0.01   | 0.01 ± 0.00        | 0.04 ± 0.01   | <b>0.10 ± 0.01</b>  | 0.06 ± 0.02        | 0.04 ± 0.01        |
| Cysteine (x10)         | 0.03 ± 0.01             | 0.02 ± 0.00   | 0.02 ± 0.00        | 0.03 ± 0.01   | 0.07 ± 0.01         | 0.04 ± 0.01        | 0.06 ± 0.01        |
| Dehydroascorbate (x10) | 0.28 ± 0.17             | 0.06 ± 0.03   | 0.04 ± 0.01        | 0.05 ± 0.02   | 0.22 ± 0.07         | 0.14 ± 0.06        | 0.08 ± 0.02        |
| Fructose               | 0.03 ± 0.01             | 0.03 ± 0.01   | 0.02 ± 0.01        | 0.03 ± 0.01   | 0.05 ± 0.01         | 0.05 ± 0.01        | 0.04 ± 0.01        |
| Fumarate (x10)         | 0.20 ± 0.02             | 0.26 ± 0.03   | 0.31 ± 0.11        | 0.30 ± 0.05   | <b>0.85 ± 0.14</b>  | 0.44 ± 0.14        | <b>0.38 ± 0.04</b> |
| GABA                   | 63.04 ± 7.88            | 38.86 ± 14.11 | 53.39 ± 20.75      | 52.27 ± 13.69 | 182.90 ± 48.73      | 87.76 ± 36.26      | 62.25 ± 23.31      |
| Galactose (x10)        | 0.30 ± 0.03             | 0.41 ± 0.07   | <b>0.16 ± 0.05</b> | 0.41 ± 0.07   | <b>1.39 ± 0.13</b>  | 0.69 ± 0.34        | <b>0.78 ± 0.11</b> |
| Galacturonate (x10)    | 0.20 ± 0.12             | 0.21 ± 0.10   | 0.22 ± 0.09        | 0.22 ± 0.14   | 1.08 ± 0.47         | 0.61 ± 0.38        | 0.33 ± 0.17        |
| Glucose (x10)          | 0.30 ± 0.04             | 0.28 ± 0.08   | <b>0.16 ± 0.04</b> | 0.39 ± 0.12   | 0.88 ± 0.28         | 1.04 ± 0.41        | <b>0.56 ± 0.04</b> |
| Glutamate              | 9.97 ± 2.25             | 11.54 ± 2.69  | 13.57 ± 5.05       | 13.23 ± 2.49  | <b>36.72 ± 2.64</b> | 19.35 ± 6.52       | 16.88 ± 0.99       |
| Glutamine              | 0.21 ± 0.04             | 0.14 ± 0.01   | 0.11 ± 0.05        | 0.33 ± 0.17   | 0.34 ± 0.07         | <b>2.21 ± 0.69</b> | 0.23 ± 0.05        |
| Glutarate              | 0.05 ± 0.01             | 0.05 ± 0.01   | 0.05 ± 0.01        | 0.15 ± 0.08   | <b>0.15 ± 0.02</b>  | 0.19 ± 0.07        | 0.06 ± 0.01        |
| Glycerol 1-P           | 0.07 ± 0.02             | 0.06 ± 0.01   | 0.08 ± 0.03        | 0.13 ± 0.06   | 0.15 ± 0.04         | 0.11 ± 0.03        | <b>0.22 ± 0.04</b> |
| Glycine (x10)          | 0.04 ± 0.01             | 0.06 ± 0.01   | 0.07 ± 0.03        | 0.08 ± 0.02   | <b>0.20 ± 0.02</b>  | <b>0.12 ± 0.02</b> | <b>0.11 ± 0.01</b> |
| Isoleucine (x10)       | 0.1 ± 0.02              | 0.08 ± 0.01   | 0.16 ± 0.08        | 0.12 ± 0.05   | <b>0.26 ± 0.03</b>  | 0.16 ± 0.04        | 0.20 ± 0.05        |
| Isomaltose (x10)       | 0.15 ± 0.04             | 0.23 ± 0.05   | 0.70 ± 0.47        | 0.43 ± 0.16   | <b>0.53 ± 0.11</b>  | 0.58 ± 0.24        | 0.21 ± 0.08        |
| Leucine (x10)          | 0.01 ± 0.00             | 0.01 ± 0.00   | 0.01 ± 0.01        | 0.02 ± 0.01   | 0.02 ± 0.00         | 0.01 ± 0.00        | 0.04 ± 0.02        |
| Lysine (x10)           | 0.12 ± 0.07             | 0.12 ± 0.05   | 0.07 ± 0.04        | 0.09 ± 0.05   | 0.30 ± 0.17         | 0.08 ± 0.02        | 0.20 ± 0.10        |
| Malate                 | 0.02 ± 0.01             | 0.02 ± 0.01   | 0.04 ± 0.02        | 0.04 ± 0.01   | <b>0.11 ± 0.02</b>  | 0.04 ± 0.02        | 0.04 ± 0.01        |
| Maltitol               | 1.23 ± 0.38             | 2.10 ± 0.17   | 1.20 ± 0.37        | 1.77 ± 0.65   | <b>6.16 ± 1.25</b>  | 3.29 ± 1.50        | 2.96 ± 1.31        |
| Maltose (x10)          | 0.01 ± 0.00             | 0.01 ± 0.00   | 0.01 ± 0.00        | 0.00 ± 0.00   | 0.02 ± 0.00         | 0.01 ± 0.00        | 0.01 ± 0.00        |

|                       |                |                    |                    |                |                       |                    |                       |
|-----------------------|----------------|--------------------|--------------------|----------------|-----------------------|--------------------|-----------------------|
| Mannose               | 8.49 ± 0.85    | 11.35 ± 1.75       | <b>4.06 ± 1.00</b> | 10.08 ± 1.65   | <b>34.21 ± 3.33</b>   | 16.96 ± 8.48       | 15.87 ± 4.77          |
| Methionine(x10)       | 0.03 ± 0.00    | 0.02 ± 0.00        | 0.03 ± 0.01        | 0.04 ± 0.01    | <b>0.09 ± 0.01</b>    | 0.03 ± 0.01        | 0.06 ± 0.02           |
| Myo-inositol          | 0.04 ± 0.01    | 0.03 ± 0.02        | 0.02 ± 0.01        | 0.03 ± 0.01    | 0.09 ± 0.03           | 0.08 ± 0.04        | 0.07 ± 0.02           |
| Oxalate *             | 0.02 ± 0.01    | 0.01 ± 0.00        | 0.02 ± 0.01        | 0.02 ± 0.01    | <b>0.08 ± 0.02</b>    | 0.06 ± 0.01        | 0.02 ± 0.00           |
| Palmeate (16:0) (x10) | 0.10 ± 0.10    | 0.10 ± 0.05        | 0.06 ± 0.02        | 0.05 ± 0.02    | 0.25 ± 0.08           | 0.27 ± 0.14        | 0.12 ± 0.04           |
| Phenylalanine (x10)   | 0.06 ± 0.02    | 0.05 ± 0.01        | 0.05 ± 0.02        | 0.08 ± 0.02    | 0.14 ± 0.03           | 0.08 ± 0.02        | 0.11 ± 0.04           |
| Proline               | 0.11 ± 0.03    | 0.14 ± 0.03        | 0.16 ± 0.07        | 0.39 ± 0.14    | 0.31 ± 0.08           | 0.21 ± 0.07        | 0.20 ± 0.08           |
| Putrescine            | 6.54 ± 3.26    | 4.81 ± 1.90        | 4.04 ± 1.11        | 4.32 ± 2.02    | 17.57 ± 6.71          | 20.46 ± 13.27      | 9.77 ± 3.42           |
| Quinate               | 0.03 ± 0.00    | 0.04 ± 0.01        | 0.02 ± 0.00        | 0.05 ± 0.01    | <b>0.13 ± 0.01</b>    | 0.06 ± 0.02        | <b>0.06 ± 0.01</b>    |
| Raffinose             | 0.03 ± 0.01    | 0.02 ± 0.01        | 0.21 ± 0.15        | 0.14 ± 0.06    | 0.08 ± 0.01           | 0.07 ± 0.03        | 0.05 ± 0.01           |
| Rhamnose              | 1.51 ± 0.18    | 1.51 ± 0.23        | 3.28 ± 1.77        | 2.70 ± 0.55    | <b>5.11 ± 1.10</b>    | 7.31 ± 2.95        | 2.46 ± 0.37           |
| Ribose                | 145.58 ± 16.46 | 153.14 ± 20.10     | 196.63 ± 93.35     | 215.37 ± 53.25 | <b>491.02 ± 44.89</b> | 278.89 ± 64.79     | <b>307.64 ± 38.21</b> |
| Serine                | 2.16 ± 0.38    | 2.46 ± 0.52        | 5.65 ± 3.75        | 6.53 ± 2.52    | 6.67 ± 0.91           | 4.16 ± 1.28        | 7.12 ± 2.01           |
| Shikimate (x10)       | 0.09 ± 0.01    | 0.12 ± 0.01        | 0.04 ± 0.02        | 0.14 ± 0.02    | <b>0.36 ± 0.08</b>    | <b>0.17 ± 0.04</b> | <b>0.18 ± 0.03</b>    |
| Stearate (18:0) (x10) | 0.10 ± 0.04    | 0.08 ± 0.03        | 0.05 ± 0.01        | 0.06 ± 0.02    | 0.18 ± 0.05           | 0.21 ± 0.08        | 0.11 ± 0.03           |
| Succinate             | 0.51 ± 0.11    | 0.62 ± 0.14        | 0.43 ± 0.06        | 0.77 ± 0.25    | <b>1.82 ± 0.40</b>    | 0.79 ± 0.35        | 1.07 ± 0.22           |
| Sucrose (x10)         | 0.05 ± 0.01    | 0.05 ± 0.02        | 0.08 ± 0.03        | 0.10 ± 0.05    | 0.22 ± 0.14           | 0.07 ± 0.04        | 0.10 ± 0.03           |
| Tartrate              | 0.52 ± 0.18    | 0.52 ± 0.15        | 0.21 ± 0.04        | 1.03 ± 0.57    | 3.48 ± 1.17           | 1.15 ± 0.49        | 0.58 ± 0.03           |
| Threonine (x10)       | 0.03 ± 0.01    | 0.02 ± 0.00        | 0.07 ± 0.05        | 0.05 ± 0.01    | <b>0.06 ± 0.01</b>    | 0.04 ± 0.01        | 0.08 ± 0.02           |
| Trehalose             | 0.06 ± 0.01    | <b>0.01 ± 0.00</b> | 0.05 ± 0.02        | 0.05 ± 0.02    | <b>0.20 ± 0.03</b>    | 0.06 ± 0.01        | 0.04 ± 0.01           |
| Tryptophan            | 4.12 ± 2.13    | 2.94 ± 1.43        | 4.03 ± 1.63        | 4.10 ± 2.34    | 7.07 ± 2.55           | 3.50 ± 2.12        | 5.94 ± 3.63           |
| Valine                | 2.90 ± 0.52    | 2.36 ± 0.32        | 3.99 ± 1.94        | 3.42 ± 0.94    | 7.60 ± 0.67           | 3.82 ± 0.82        | 5.06 ± 1.26           |
| Xylose (x10)          | 0.05 ± 0.02    | 0.04 ± 0.02        | 0.04 ± 0.01        | 0.07 ± 0.02    | <b>0.15 ± 0.01</b>    | 0.11 ± 0.05        | 0.08 ± 0.02           |

\*( $\mu\text{mol.g}^{-1}$  FW)
